# Supplementary figures and images for: Serum human epididymis protein 4 vs carbohydrate antigen 125 for ovarian cancer diagnosis: a systematic review
Source: HighWire-hosted journal article supplement (doi:10.1136/jclinpath-2012-201031), 2013-02-20

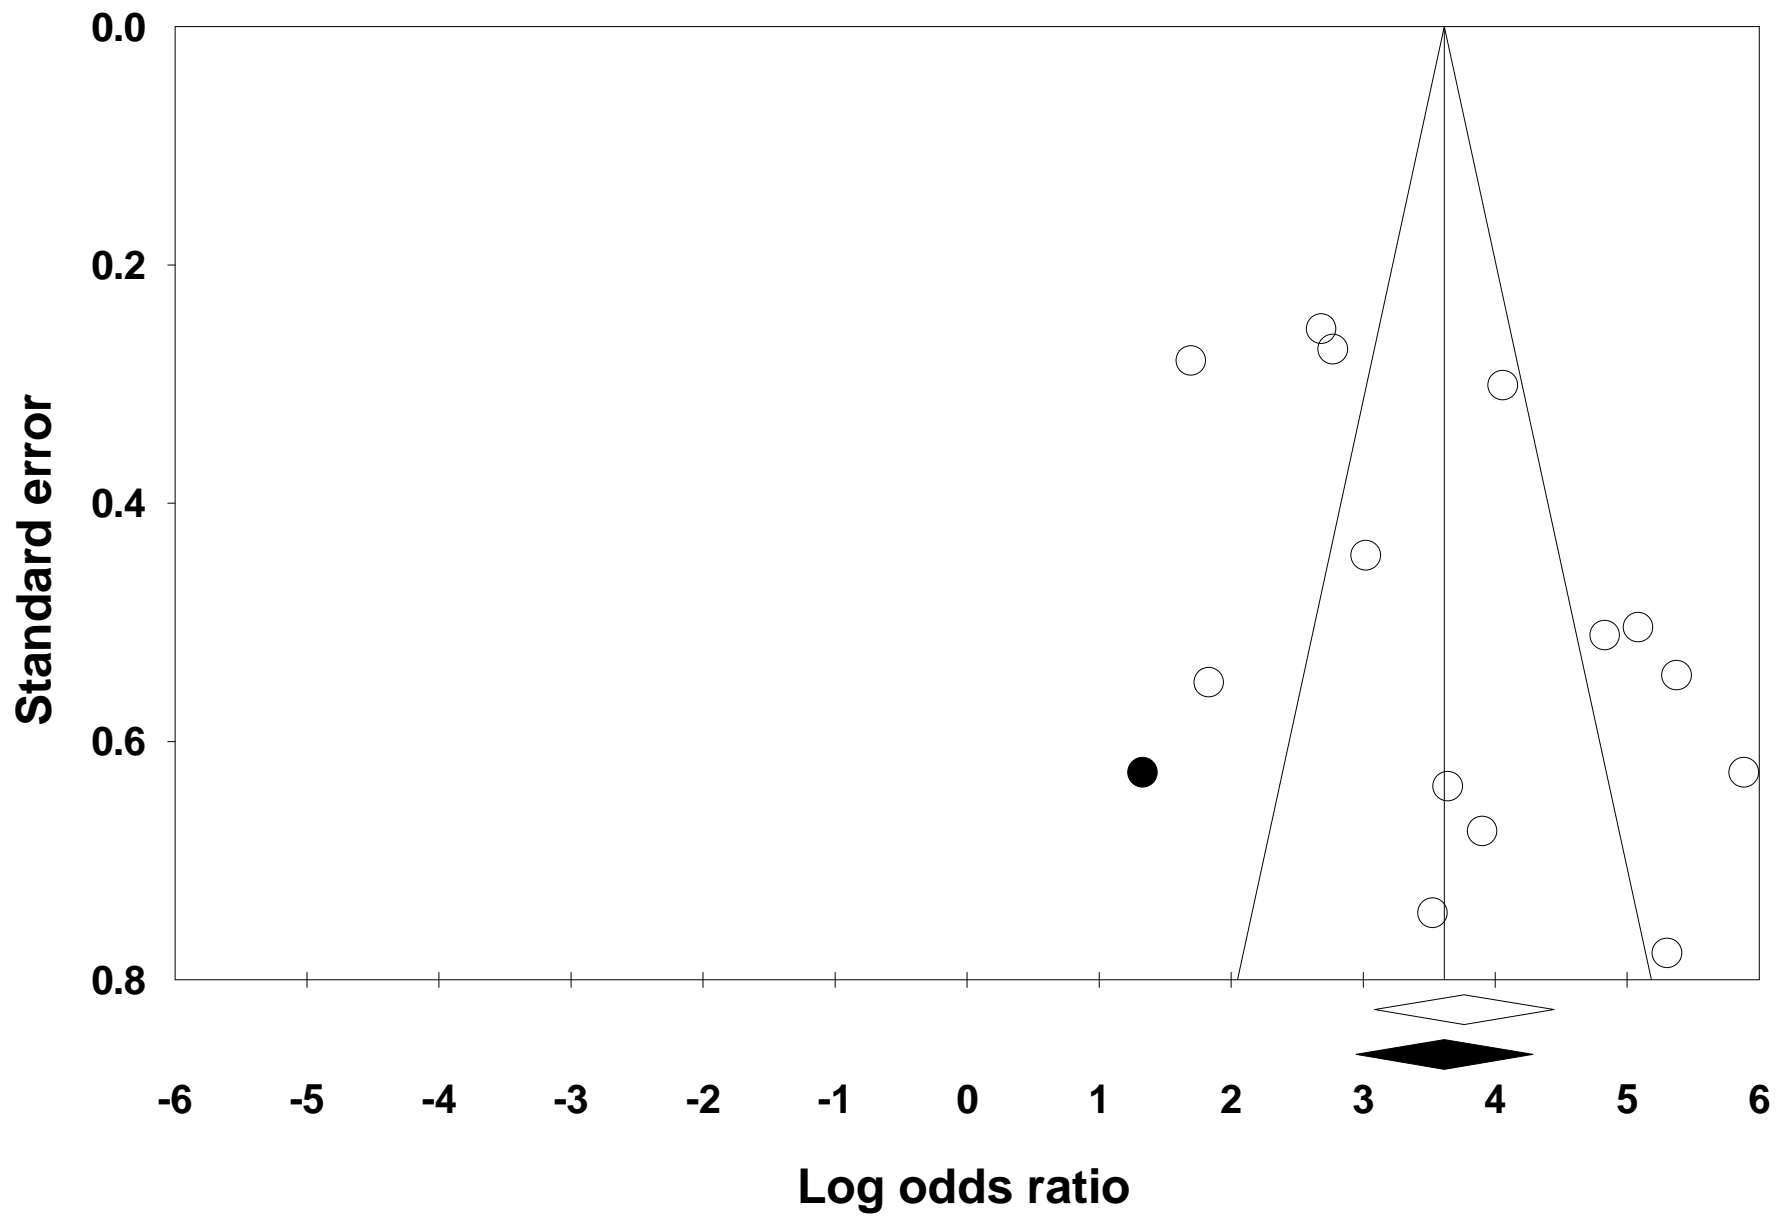

Supplement: jclinpath-2012-201031supp_figure2.pdf [file jclinpath-2012-201031supp_figure2.pdf]
